# Supplementary material for: Safety and cost analysis of selective histopathological examination following appendicectomy and cholecystectomy (FANCY study): protocol and statistical analysis plan of a prospective observational multicentre study
Source: PubMed Central journal article supplement (PMC7008446; doi:10.1136/bmjopen-2019-035912), 2019-12-23
Supplement: bmjopen-2019-035912supp001.pdf [file bmjopen-2019-035912supp001.pdf]

**SUPPLEMENTARY MATERIAL 1****Questions of the scoring form ‘Macroscopic examination of the appendix’**

1) Who performed the macroscopic examination of the appendix?

*Multiple answers possible*

- Surgeon
- Surgical resident

2) Are there any macroscopic abnormalities suspicious for a malignant neoplasm during visual inspection and/or digital palpation?

- Yes (please specify below)
- No
- Proper assessment is not possible due to inflammation

2a. If yes, specify the macroscopic abnormalities

*Multiple answers possible*

- Visible tumour
- Palpable tumour
- Other, namely ...

3) Do you believe additional histopathological examination by the pathologist is indicated?

- Yes, because of the above-mentioned abnormalities.
- Yes, because proper assessment of the appendix was not possible.
- Yes, because ...
- No

**Questions of the scoring form ‘Macroscopic examination of the gallbladder’**

1) Who performed the macroscopic examination of the gallbladder?

*Multiple answers possible*

- Surgeon
- Surgical resident

2) Are there any macroscopic abnormalities suspicious for a malignant neoplasm during visual inspection and/or digital palpation?

- Yes (please specify below)
- No

2a. If yes, specify the macroscopic abnormalities

*Multiple answers possible*

- |                                    |                                                        |
|------------------------------------|--------------------------------------------------------|
| <input type="radio"/> Ulcer        | <input type="radio"/> Wall thickening                  |
| <input type="radio"/> Cyst         | <input type="radio"/> Polyp                            |
| <input type="radio"/> Hardening    | <input type="radio"/> Tumour suspicious for malignancy |
| <input type="radio"/> Irregularity | <input type="radio"/> Other, namely ...                |

3) Do you believe additional histopathological examination by the pathologist is indicated?

- Yes, because of the above-mentioned abnormalities.
- Yes, because ...
- No
